# Supplementary material
Source: PubMed Central journal article supplement (PMC5385957)
Supplement: supp_tpc.16.00831_TPC2016-00831-RAR2_Supplemental_Data.pdf [file supp_tpc.16.00831_TPC2016-00831-RAR2_Supplemental_Data.pdf]

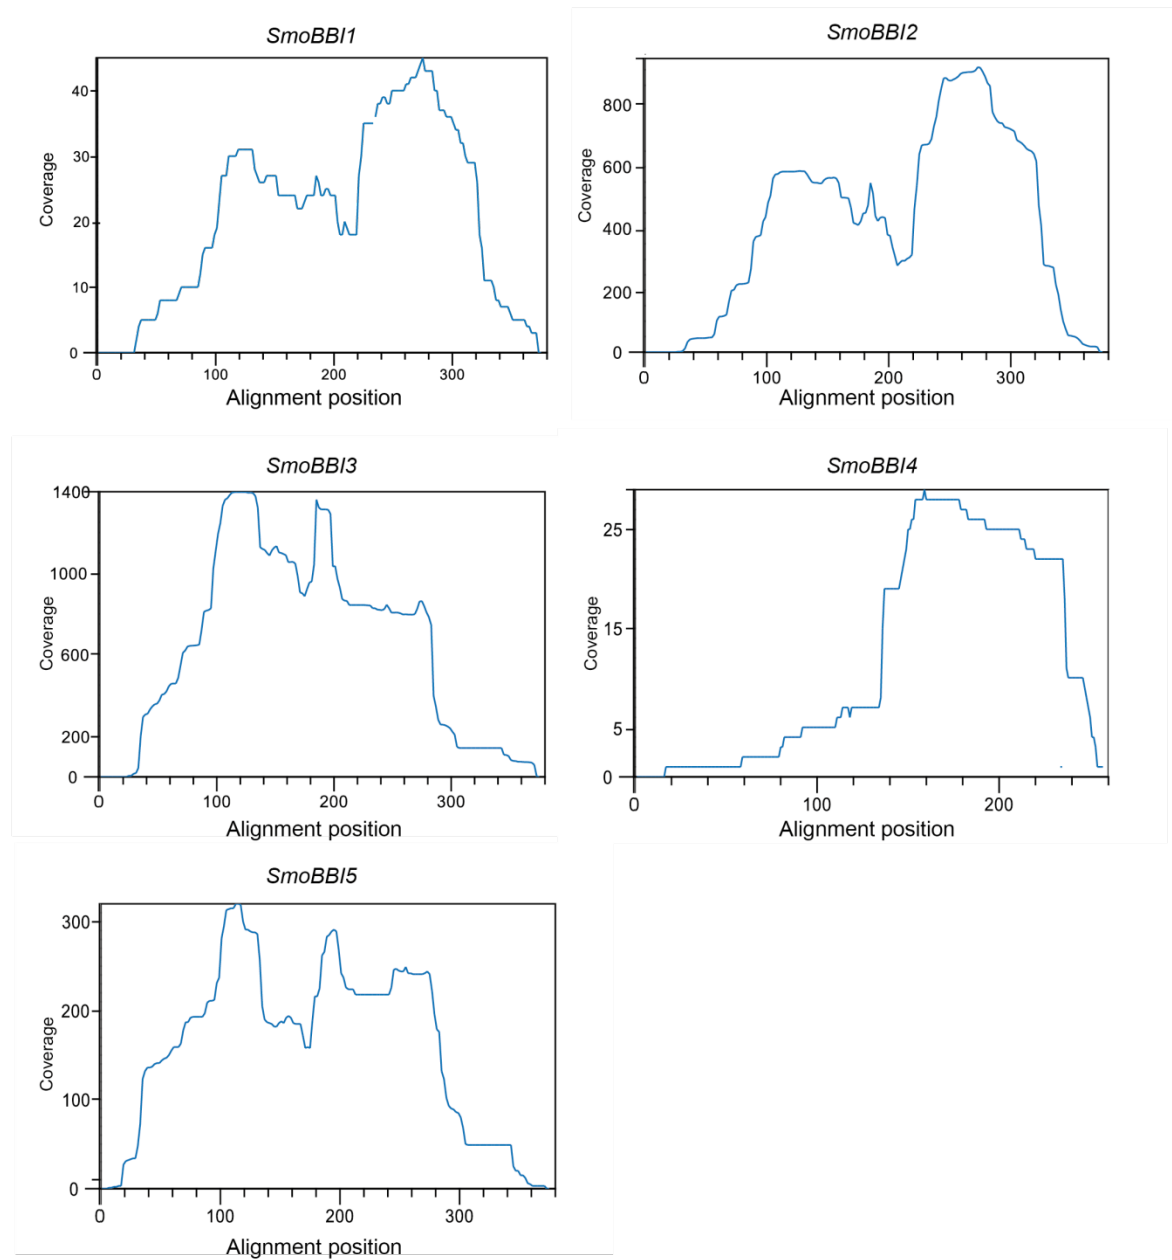

**Supplemental Figure 1.** Relative *BBI* transcript abundance in *S. moellendorffii* tissue shown as the number of clean RNAseq reads that mapped to each open reading frame (Supports Figure 2). Coverage (Y axis) is the number of reads contributing to a given position in the mapping.

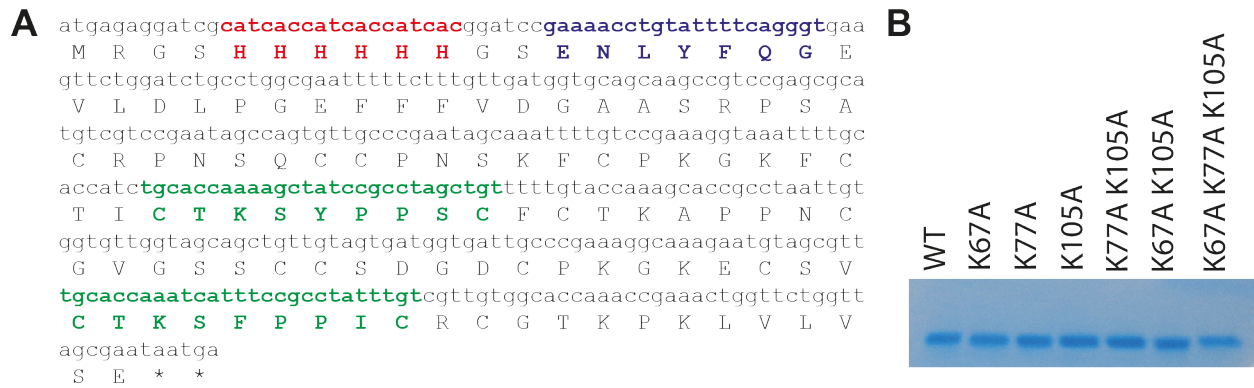

**Supplemental Figure 2.** Recombinant *S. moellendorffii* BBI3<sub>22-124</sub> (Supports Figure 3)  
**(A)** *E. coli* codon-optimised ORF encoding BBI3 aligned with the translated sequence. The six-His tag is indicated in red and TEV recognition sequence is indicated in purple. Both conserved BBI-like inhibitory motifs are indicated in green.  
**(B)** SDS-PAGE gel of recombinant BBI3 and BBI3 mutants indicating purity following immobilized metal affinity chromatography and gel-filtration chromatography.

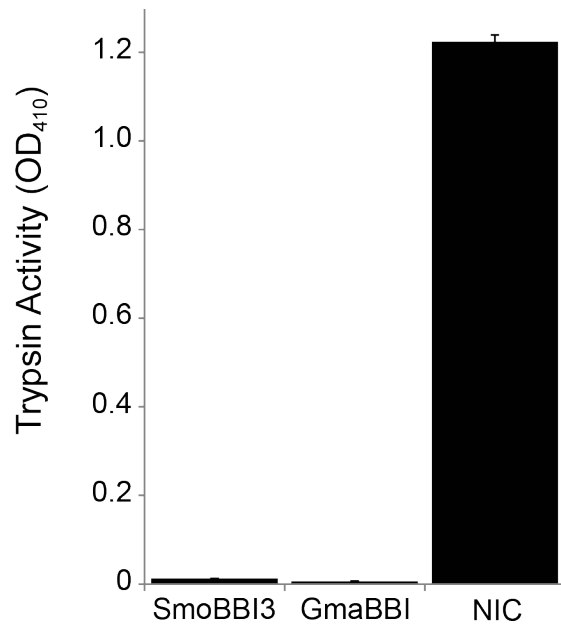

**Supplemental Figure 3.** Trypsin inhibition by *S. moellendorffii* BBI3 (SmoBBI3) and *Glycine max* BBI (GmaBBI) (Supports Figure 3). Inhibitors were incubated with trypsin and the substrate of trypsin, BAPNA. Trypsin activity is reported as absorbance measurements at OD<sub>410</sub> which is indicative of BAPNA conversion to p-nitroaniline by trypsin and compared to the no inhibitor control (NIC). Error bars represent standard deviation for three technical replicates in a single microtiter plate.

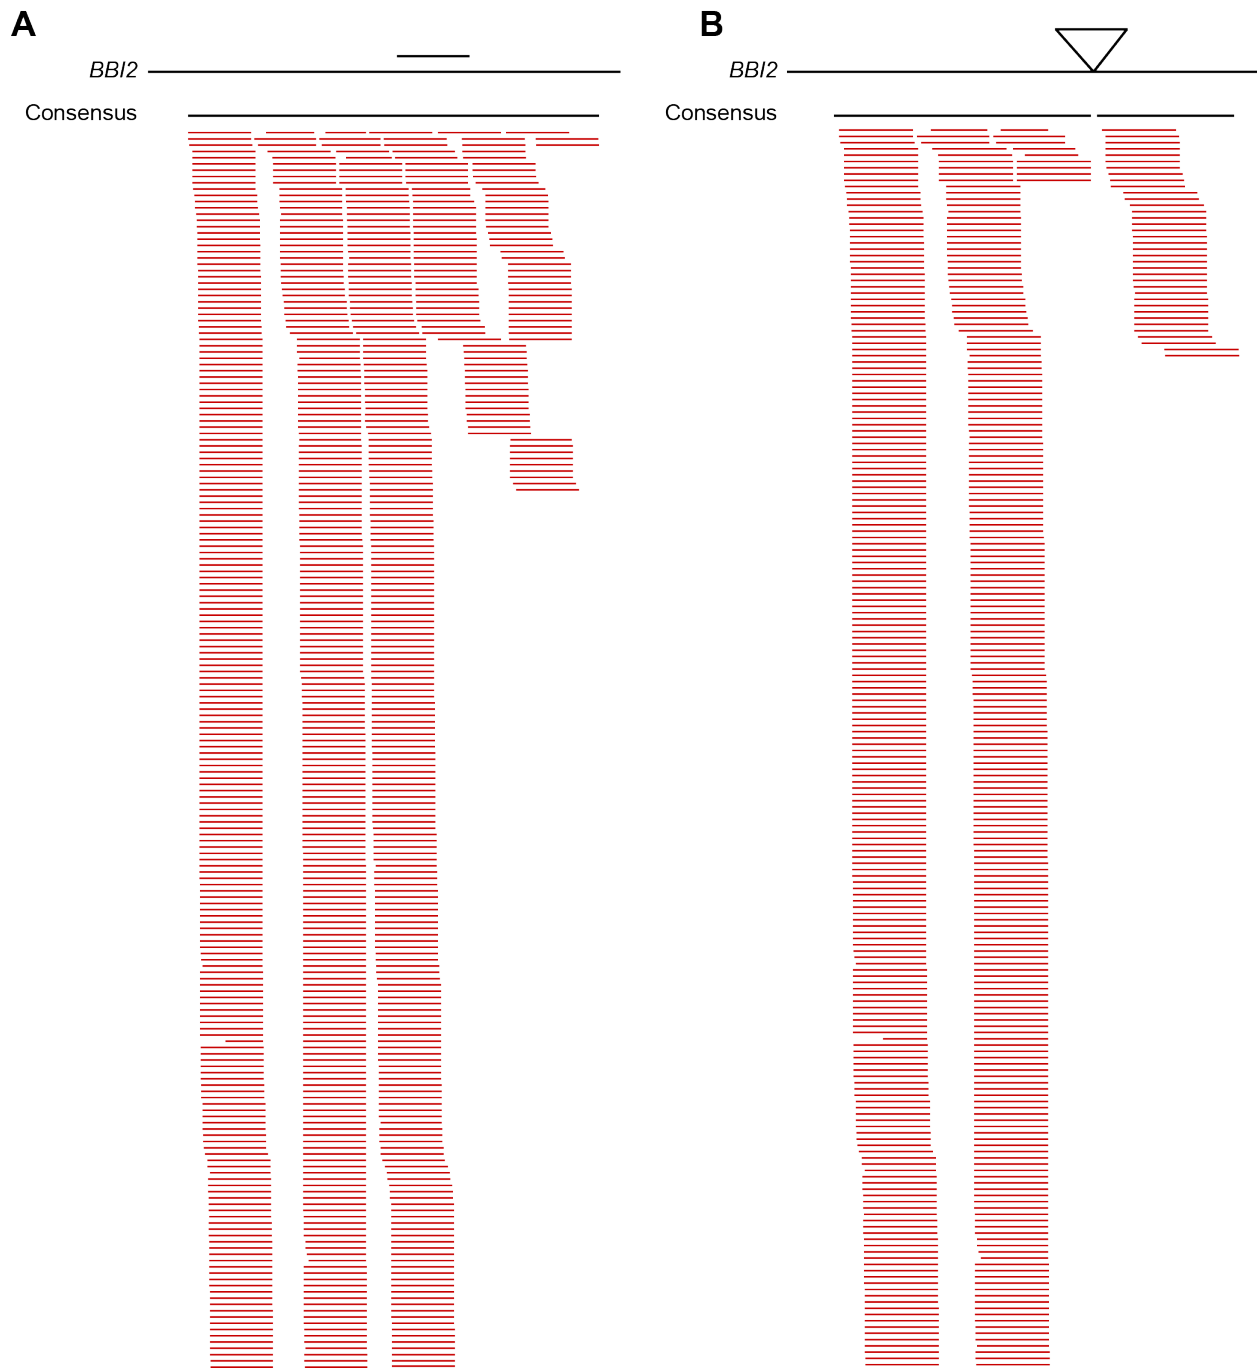

**Supplemental Figure 4.** Mapping of RNA-seq reads to genomic DNA sequence shows that *BBI2* is intronless (Supports Figure 2). No RNA-seq reads mapped across the currently annotated exon-exon junction in the gene model (GenBank: XP\_002981001). **(A)** RNA-seq reads mapped onto genomic DNA including the sequence coding for *BBI2* (*S. moellendorffii* genome v1.0: scaffold\_47:332896...333651). The position of the currently (erroneously) annotated intron is indicated above with a black bar. **(B)** RNA-seq reads mapped to same sequence as in panel **A**, but lacking the predicted intron from the current predicted gene model for *BBI2* (XM\_002980955.1). The location of the removed sequence is indicated with a triangle.

**Supplemental Table 1.** All primers used in this study shown in the 5' to 3' direction. Primers include those designed for determining sequences of all *S. moellendorffii* BBI-like genes (SmoBBI) by RACE and subsequent full length transcripts (FL). The mutated codon in primers for site directed mutagenesis of *BBI3* are underlined. Primers for cloning full length BBI-like genes are labelled by species *Musa acuminata* (Mac) and *Isoetes drumondii* (ldr).

| Use                                | Primer                                |
|------------------------------------|---------------------------------------|
| SmoBBI1 5' RACE                    | TTGGGCTGTAGCCGGTTTCAC                 |
| SmoBBI1 5' RACEb                   | CAGGGTTGACCGCCACATGA                  |
| SmoBBI2 5' RACE                    | AGCGCCACAGCGACAAATAGGT                |
| SmoBBI2 3' RACE                    | TTGCTCCTCTCATTGCGCTGCT                |
| SmoBBI3 5' RACE                    | CACAGTCAACAGGGTTGACCAGCA              |
| SmoBBI3 3' RACE                    | CCCTCCAAACTGCGGAGTAGGCAGT             |
| SmoBBI4 5' RACE                    | TGCGGCGCTGCATCTTTTCG                  |
| SmoBBI4 3' RACE                    | TCCAGGCCATGGTGTGCAGG                  |
| SmoBBI5 5' RACE                    | CATAGCCACACATTATCATTATGA              |
| SmoBBI5 3' RACE                    | CCCTCCAAACTGCGGAGTAGGCAGT             |
| SmoBBI1 FL forward                 | ATTCTCTATTTTCGCTATGGCTCAGTCTATC       |
| SmoBBI1 FL reverse                 | TAGCCACATTATCATTATGAAAGATCTC          |
| SmoBBI2/SmoBBI3/SmoBBI5 FL forward | ATCCTCTGTTTTCGCTATGGCTCAG             |
| SmoBBI2/SmoBBI3/SmoBBI5 FL reverse | GCATAGCCACACATTATCATTATGG             |
| SmoBBI4 FL forward                 | TGATGAGCAACGCGATGATCTAGTCTC           |
| SmoBBI4 FL reverse                 | AACCAAAAAAACTCTCTTTACTTTCTCGAAAC      |
| SmoBBI3 K67A forward               | TGCACCATCTGCACCGCAAGCTATCCG           |
| SmoBBI3 K67A reverse               | CGGATAGCTT <u>TGCGGT</u> GCAGATGGTGCA |
| SmoBBI3 K77A forward               | TGTTTTTGTACCGCAGCACCGCCTAATTG         |
| SmoBBI3 K77A reverse               | CAATTAGGCGGTGCTGCGGTACAAAAACA         |
| SmoBBI3 K105A forward              | TAGCGTTTGCACCGCATCATTTCCGCC           |
| SmoBBI3 K105A reverse              | GGCGGAAATGAT <u>TGCGGT</u> GCAAACGCTA |
| MacM0RX78 FL forward               | TGGTGTGGAAGATGAGGAGC                  |
| MacM0RX78 FL reverse               | AATGAACACCAAACCGCTGC                  |
| MacM0RX79 FL forward               | TACAGCTGAGTGCGAAGTGG                  |
| MacM0RX79 FL reverse               | ACCAAACCACTAGCTTGCGA                  |
| MacM0TRV2 FL forward               | CGCGGATAGAAGACGCAGAT                  |
| MacM0TRV2 FL reverse               | ACAATTTCCCGGAAGCGGAT                  |
| ldrBBI FL forward                  | ATCCGAGAACCGGGGCG                     |
| ldrBBI FL reverse                  | TCGTATAGGCTACATATGCACGC               |

**Supplemental Data Set 1.** Accession numbers and sequence information for sequences indicated in **Figure 4**. Sequences used in the phylogeny presented in **Figure 6** have a corresponding ID. Assembly version numbers are given for genomes accessed through the Phytozome BLAST portal. Assembly accession numbers are given for genomes accessed through the NCBI BLAST portal.

**Supplemental File 1.** Sequence alignment used to generate the BBI phylogeny shown in Figure 6. Sequences were aligned using ClustalW (2.0.12) followed by manual editing in BioEdit Sequence Alignment Editor (7.2.5).
